# Supplementary material for: Design of a Recombinant Multivalent Epitope Vaccine Based on SARS-CoV-2 and Its Variants in Immunoinformatics Approaches
Source: PubMed Central journal article supplement (PMC9120605; doi:10.3389/fimmu.2022.884433), 2022-05-06
Supplement: DataSheet_1.pdf [file DataSheet_1.pdf]

## *Supplementary Material*

### **1 Supplementary Data**

#### **1.1 The amino acid sequence of S proteins**

**YP\_009724390:** MFVFLVLLPLVSSQCVNLTTRTQLPPAYTNSFTRGVYYPDKVFRSSVLHSTQDLFLPFFSNVTWFHAIHVSNGTKRFDNPVLPFNDGVYFASTEKSNIIRGWIFGTTLDSKTQSL  
LIVN NATNVVIK VCEFQFCNDPFLGVYHKNNKSWMESEFRVYSSANNCTFEYVSQPFLMDL  
EGKQGNFKNLREFVFKNIDGYFKIYSKHTPINLVRDLPQGFSALEPLVDLPIGINITRFQTL  
LALHRSYLTPGDSSSGWTAGAAAYYVGYLQPRTFLLKYNENGTITDAVDCALDPLSETKCT  
LK SFTVEKGIYQTSNFRVQPTESIVRFPNITNLCPFGEVFNATRFASVYAWNKRKISNCV  
ADYSVLYNSASFSTFKCYGVSPTKLNDLCFTNVYADSFVIRGDEV RQIAPGQTGKIADYNY  
KLPDDFTGCVIAWNSNNLDSKVGGNYNYLYRLFRKSNLKPFERDISTEYIYQAGSTPCNGVEG  
FNCYFPLQSYGFQPTNGVGYQPYRVVLSFELLHAPATVCGPKKSTNLVKNKCVNFNFNGL  
TGTGVLTESNKKFLPFQQGRDIADTTDAVRDPQTLEILDITPCSFGGVSVITPGTNTSNQVAV  
LYQDVNCTEVPVAIHADQLTPTWRVYSTGNSVVFQTRAGCLIGAEHVNNSYECDIPIGAGICA  
SYQTQTNSPRRARSVASQSIIAYTMSLGAENSVAYSNNNSIAIPTNFTISVTTEILPVSMTKTSVD  
CTMYICGDSTECSNLLLQYGSFCTQLNRALTGIAVEQDKNTQEVFAQVKQIYKTPPIKDFGG  
FNFSQILPDPSKPSKRSFIEDLLFNKVTLADAGFIKQYGDCLGDIAARDLICAQKFNGLTVLPP  
LLTDEMIAQYTSALLAGTITSGWTFGAGAALQIPFAMQMAYRFNGIGVTQNVLYENQKLI  
ANQFNSAIGKIQDSLSTASALGKLQDVVNQNAQALNTLVKQLSSNFGAISSVLNDILSRDKV  
EAEVQIDRLITGRLQSLQTYVTQQLIRAAEIRASANLAATKMSECVLGQSKRVDFCGKGYHL  
MSFPQSAPHGVVFLHVTVPAQEKNTTAPAICHGDKAHFPREGVVFVSNNGTHWFVTQRNFY  
EPQIITDNTFVSGNCDVVIGIVNNTVYDPLQPELDSFKEELDKYFKNHTSPDVDLGDISGINA  
SVVNIQKEIDRLNEVAKNLNESLIDLQELGKYEYIKWPWYIWLGFIAGLIAIVMVTIMLCC  
MTSCCCLKGCCSCGSCCKFDEDDSEPVLKGVKLHYT

**QRX39358:** MFVFLVLLPLVSSQCVNLTTRTQLPPAYTNSFTRGVYYPDKVFRSSVLHST  
QDLFLPFFSNVTWFHAISGTNGTKRFDNPVLPFNDGVYFASTEKSNIIRGWIFGTTLDSKTQSL  
LIVN NATNVVIK VCEFQFCNDPFLGVYHKNNKSWMESEFRVYSSANNCTFEYVSQPFLMDL  
EGKQGNFKNLREFVFKNIDGYFKIYSKHTPINLVRDLPQGFSALEPLVDLPIGINITRFQTL  
LALHRSYLTPGDSSSGWTAGAAAYYVGYLQPRTFLLKYNENGTITDAVDCALDPLSETKCT  
LK

SFTVEKGIYQTSNFRVQPTESIVRFPNITNLCPFGEVFNATRFASVYAWNRKRISNCVADYSV  
 LYNSASFSTFKCYGVSPTKLNDLCFTNVYADSFVIRGDEVQRQIAPGQTGKIADYNYKLPDDF  
 TGCVIAWNSNNLDSKVGGNYNYLYRLLFRKSNLKPFERDISTEIQAGSTPCNGVEGFNCYFP  
 LQSYGFQPTYGVGYQPYRVVLSFELLHAPATVCGPKKSTNLVKNKCVNFNFNGLTGTGVL  
 TESNKKFLPFQFGRDIDDDTTDAVRDPQTLEILDITPCSFSGGVSVITPGTNTSNQVAVLYQGV  
 NCTEVPVAIHADQLTPTWRVYSTGSNVFQTRAGCLIGAEHVNNSYECDIPIGAGICASYQTQ  
 TNSHRRARSVASQSIIAYTMSLGAENSVAYSNNNSIAIPINFTISVTTEILPVSMTKTSVDCTMYI  
 CGDSTECSNLLLQYGSFCTQLNRALTGIAVEQDKNTQEVFAQVKQIYKTPPIKDFGGFNFSQI  
 LPDPSKPSKRSFIEDLLFNKVTLADAGFIKQYGDCLGDIAARDLCAQKFNGLTVLPPLLTDE  
 MIAQYTSALLAGTITSGWTFGAGAALQIPFAMQMAYRFNGIGVTQNVLYENQKLIANQFNS  
 AIGKIQDSLSSTASALGKLQDVVNQNAQALNTLVKQLSSNFGAISSVLNDILARLDKVEAEV  
 QIDRLITGRLQSLQTYVTQQLIRAAEIRASANLAATKMSECVLGQSKRVDFCGKGYHLMSPF  
 QSAPHGVVFLHVTYVPAQEKNFTTAPAICHGKAHFPREGVVFVSNGTHWFVTQRNFYEPQII  
 TTHNTFVSGNCDVVIGIVNNTVYDPLQPELDSFKEELDKYFKNHTSPDVDLGDISGINASVVN  
 IQKEIDRLNEVAKNLNESLIDLQELGKYEYIKWPWYIWLGFIAGLIAIVMVTIMLCCMTSCC  
 SCLKGCCSCGSCCKFDEDDSEPVKGVKLVHYT

**QRV12312:** MFVFLVLLPLVSSQCVNLTRTQLPPAYTNSFTRGVYYPDKVFRSSVLHST  
 QDLFLPFFSNVTWFHAIHVSNGTKRFANPVLPFNDGVYFASTEKSNIIRGWIFGTTLDSTK  
 QSLIVNNAATNVVIKVFCEFCNDPFLGVYHKNKSWMESEFRVYSSANNCTFEYVSQPFL  
 MDLEGKQGNFKNLREFVFKNIDGYFKIYSKHTPINLVRGLPQGFSALEPLVDLPIGINITRFQT  
 LHRSYLTPGDSSSGWTAGAAAYYVGYLQPRTFLLKYNENGTITDAVDCALDPLSETKCTLK  
 SFTVEKGIYQTSNFRVQPTESIVRFPNITNLCPFGEVFNATRFASVYAWNRKRISNCVADYSV  
 LYNSASFSTFKCYGVSPTKLNDLCFTNVYADSFVIRGDEVQRQIAPGQTGKIADYNYKLPDDF  
 TGCVIAWNSNNLDSKVGGNYNYLYRLLFRKSNLKPFERDISTEIQAGSTPCNGVKGFNCYFP  
 LQSYGFQPTYGVGYQPYRVVLSFELLHAPATVCGPKKSTNLVKNKCVNFNFNGLTGTGVL  
 TESNKKFLPFQFGRDIADTTDAVRDPQTLEILDITPCSFSGGVSVITPGTNTSNQVAVLYQGV  
 NCTEVPVAIHADQLTPTWRVYSTGSNVFQTRAGCLIGAEHVNNSYECDIPIGAGICASYQTQ  
 TNSPRRARSVASQSIIAYTMSLGVENSVAYSNNNSIAIPTNFTISVTTEILPVSMTKTSVDCTMYI  
 CGDSTECSNLLLQYGSFCTQLNRALTGIAVEQDKNTQEVFAQVKQIYKTPPIKDFGGFNFSQI  
 LPDPSKPSKRSFIEDLLFNKVTLADAGFIKQYGDCLGDIAARDLCAQKFNGLTVLPPLLTDE  
 MIAQYTSALLAGTITSGWTFGAGAALQIPFAMQMAYRFNGIGVTQNVLYENQKLIANQFNS  
 AIGKIQDSLSSTASALGKLQDVVNQNAQALNTLVKQLSSNFGAISSVLNDILSRLDKVEAEV

QIDRLITGRLQSLQTYVTQQLIRAAEIRASANLAATKMSECVLGQSKRVDFCGKGYHLMSFP  
QSAPHGVVFLHVITYVPAQEKNFTTAPAICHGDKAHFPREGVFVSNGTHWFVTQRNFYEPQII  
TTDNTFVSGNCDVVIGIVNNTVYDPLQPELDSFKEELDKYFKNHTSPDVDLGDISGINASVVN  
IQKEIDRLNEVAKNLNESLIDLQELGKYEQYIKWPWYIWLGFIAGLIAIVMVTIMLCCMTSCC  
SCLKGCCSCGSCCKFDEDDSEPVLKGVKLHYT

**QRX39425:** MFVFLVLLPLVSSQCVNFTNRTQLPSAYTNSFTRGVYYPDKVFRSSVLHST  
QDLFLPFFSNVTWFHAIHVSGTNGTKRFDNPVLPFNDGVYFASTEKSNIIRGWIFGTTLDSKT  
QSLIVNNAATNVVIKVFCEQFCNYPFLGVYHKNKNSWMESEFRVYSSANNCTFEYVSQPFL  
MDLEGKQGNFKNLSEFVFKNIDGYFKIYSKHTPINLVRDLPQGFSALEPLVDLPIGINITRFQT  
LLALHRSYLTPGDSSSGWTAGAAAYYVGYLQPRTFLLKYNENGTITDAVDCALDPLSETKC  
TLKSFTVEKGIYQTSNFRVQPTESIVRFPNITNLCPFGEVFNATRFASVYA WNRKRISNCVAD  
YSVLYNSASFSTFKCYGVSPTKLNDLCFTNVYADSFVIRGDEVQRQIAPGQTGTIADYNYKLP  
DDFTGCVIAWNSNNLDSKVGGNYNYLYRLFRKSNLKPFERDISTEYQAGSTPCNGVKGFNC  
YFPLQSYGFQPTYGVGYQPYRVVLSFELLHAPATVCGPKKSTNLVKNKCVNFNFNGLTGT  
GVLTESNKKFLPFQFGRDIADTTDAVRDPQTLEILDITPCSFGGVS VITPGTNTSNQVAVLY  
QGVNCTEVPVAIHADQLTPTWRVYSTGSNVFQTRAGCLIGAEYVNNSECDIPIGAGICASY  
QTQTNSPRRARSVASQSIIAYTMSLGAENSVAYSNNNSIAIPTNFTISVTTEILPVSMTKTSVDCT  
MYICGDSTECSNLLLQYGSFCTQLNRALTGIAVEQDKNTQEVFAQVKQIYKTPPIKDFGGFN  
FSQILPDPSKPSKRSFIEDLLFNKVTLADAGFIKQYGDCLGDIAARDLICAQKFNGLTVLPPLL  
TDEMIAQYTSALLAGTITSGWTFGAGAALQIPFAMQMAYRFNGIGVTQNVLYENQKLIANQ  
FNSAIGKIQDSLSTASALGKLQDVVNQNAQALNTLVKQLSSNFGAISSVLNDILSRLDKVEA  
EVQIDRLITGRLQSLQTYVTQQLIRAAEIRASANLAAIKMSECVLGQSKRVDFCGKGYHLMS  
FPQSAPHGVVFLHVITYVPAQEKNFTTAPAICHGDKAHFPREGVFVSNGTHWFVTQRNFYEP  
QIITDNTFVSGNCDVVIGIVNNTVYDPLQPELDSFKEELDKYFKNHTSPDVDLGDISGINASF  
VNIQKEIDRLNEVAKNLNESLIDLQELGKYEQYIKWPWYIWLGFIAGLIAIVMVTIMLCCMTS  
CCSCLKGCCSCGSCCKFDEDDSEPVLKGVKLHYT

**QRW35522:** MFVFLVLLPLVSIQCVNLTRTQLPPAYTNSFTRGVYYPDKVFRSSVLHST  
QDLFLPFFSNVTWFHAIHVSGTNGTKRFDNPVLPFNDGVYFASTEKSNIIRGWIFGTTLDSKT  
QSLIVNNAATNVVIKVFCEQFCNDPFLGVYHKNKNSCMESEFRVYSSANNCTFEYVSQPFL  
MDLEGKQGNFKNLREFVFKNIDGYFKIYSKHTPINLVRDLPQGFSALEPLVDLPIGINITRFQT  
LLALHRSYLTPGDSSSGWTAGAAAYYVGYLQPRIFLLKYNENGTITDAVDCALDPLSETKCT  
LKSFTVEKGIYQTSNFRVQPTESIVRFPNITNLCPFGEVFNATRFASVYA WNRKRISNCVADY

SVLYNSASFSTFKCYGVSPTKLNLCFTNVYADSFVIRGDEVQRQIAPGQTGKIADYNYKLPD  
DFTGCVIAWNSNNLDSKVGGNYNYRYRLFRKSNLKPFERDISTEIQAGSTPCNGVEGFNCY  
FPLQSYGFQPTNGVGYQPYRVVLSFELLHAPATVCGPKKSTNLVKNKCVNFNFNGLTGTG  
VLTESNKKFLPFQQFGRDIADTTDAVRDPQTLEILDITPCSFGGVSVITPGTNTSNQVAVLYQ  
GVNCTEVPVAIHADQLTPTWRVYSTGNSNVFQTRAGCLIGAEHVNNSYECDIPIGAGICASYQ  
TQTNSPRRARSVASQSIIAYTMSLGAENSVAYSNNSIAIPTNFTISVTTEILPVSMTKTSVDCT  
MYICGDSTECSNLLLQYGSFCTQLNRALTGIAVEQDKNTQEVFAQVKQIYKTPPIKDFGGFN  
FSQILPDPSKPSKRSFIEDLLFNKVTLADAGFIKQYGDCLGDIAARDLICAQKFNGLTVLPPLL  
TDEMIAQYTSALLAGTITSGWTFGAGAALQIPFAMQMAYRFNGIGVTQNVLYENQKLIANQ  
FNSAIGKIQDSLSTASALGKLQDVVNQNAQALNTLVKQLSSNFGAISSVLNDILSRLDKVEA  
EVQIDRLITGRLQSLQTYVTQQLIRAAEIRASANLAATKMSECVLGQSKRVDFCGKGYHLMS  
FPQSAPHGVVFLHVTVPAQEKNFTTAPAICHGDKAHFPREGVFSNGTHWFVTQRNFYEP  
QIITDNTFVSGNCDVVIGIVNNTVYDPLQPELDSFKEELDKYFKNHTSPDVDLGDISGINASV  
VNIQKEIDRLNEVAKNLNESLIDLQELGKYEQYIKWPWYIWLGFIAGLIAIVMVTIMLCCMTS  
CCSCLKGCCSCGSCCKFDEDDSEPVLKGVKLHYT

**QXF88313:** MFVFLVLLPLVSSQCVNLRTRTQLPPAYTNSFTRGVYYPDKVFRSSVLHST  
QDLFLPFFSNVTWFHAIHVSGTNGTKRFDNPVLPFNDGVYFASTEKSNIIRGWIFGTTLDSKT  
QSLIVNNAATNVVIKVECFQFCNDPFLDVYYHKNNKSWMESGVYSSANNCTFEYVSQPFLM  
DLEGKQGNFKNLREFVFKNIDGYFKIYKHTPINLVRDLPQGFSALEPLVDLPIGINITRFQTL  
LALHRSYLTPGDSSSGWTAGAAAYYVGYLQPRTFLLKYNENGTITDAVDCALDPLSETKCT  
LKSFTVEKGIYQTSNFRVQPTESIVRFPNITNLCPFGEVFNATRFASVYAWNRKRISNCVADY  
SVLYNSASFSTFKCYGVSPTKLNLCFTNVYADSFVIRGDEVQRQIAPGQTGKIADYNYKLPD  
DFTGCVIAWNSNNLDSKVGGNYNYRYRLFRKSNLKPFERDISTEIQAGSKPCNGVEGFNCY  
FPLQSYGFQPTNGVGYQPYRVVLSFELLHAPATVCGPKKSTNLVKNKCVNFNFNGLTGTG  
VLTESNKKFLPFQQFGRDIADTTDAVRDPQTLEILDITPCSFGGVSVITPGTNTSNQVAVLYQ  
GVNCTEVPVAIHADQLTPTWRVYSTGNSNVFQTRAGCLIGAEHVNNSYECDIPIGAGICASYQ  
TQTNSRRRARSVASQSIIAYTMSLGAENSVAYSNNSIAIPTNFTISVTTEILPVSMTKTSVDCT  
MYICGDSTECSNLLLQYGSFCTQLNRALTGIAVEQDKNTQEVFAQVKQIYKTPPIKDFGGFN  
FSQILPDPSKPSKRSFIEDLLFNKVTLADAGFIKQYGDCLGDIAARDLICAQKFNGLTVLPPLL  
TDEMIAQYTSALLAGTITSGWTFGAGAALQIPFAMQMAYRFNGIGVTQNVLYENQKLIANQ  
FNSAIGKIQDSLSTASALGKLQNVVNQNAQALNTLVKQLSSNFGAISSVLNDILSRLDKVEA  
EVQIDRLITGRLQSLQTYVTQQLIRAAEIRASANLAATKMSECVLGQSKRVDFCGKGYHLMS

FPQSAPHGVVFLHVTVPAQEKNFTTAPAICHGDKAHFPREGVFVSNNGTHWFVTQRNFYEP  
QIITDNTFVSGNCDVVIGIVNNTVYDPLQPELDSFKEELDKYFKNHTSPDVDLGDISGINASV  
VNIQKEIDRLNEVAKNLNESLIDLQELGKYEQYIKWPWYIWLGFIAGLIAIVMVTIMLCCMTS  
CCSCLKGCCSCGSCCKFDEDDSEPVLKGVKLHYT

## 1.2 The DNA sequence of *rSMEV*

5'-ACCACCCGTACCCAGCTGCCGCCGGCTTACGCTGCTTACCGTACCCGTACCCAGCTGC  
CGCCGGCTTACGCTGCTTACCTGCCGTTCTTCTCTAACGTTACCTGGTTCGCTGCTTACCT  
GCCGATCGGTATCAACATCACCCGTTTCGCTGCTTACTTCCCGAACATCACCAACCTGTG  
CCCGTTCGCTGCTTACCTGCAGTCTTACGGTTTCCAGCCGACCTACGCTGCTTACCAGCC  
GTACCGTGTTGTTGTTCTGTCTTTCGCTGCTTACAACACCTCTAACCAGGTTGCTGTTCTG  
TACGCTGCTTACATCGGTATCAACATCACCCGTTTCCAGACCCTGCACCGTTCTTACGGT  
CCGGGTCCGGGTAAACGACGGTGTACTTCGCTTCTACCGAAAAATCTAACATCATCGGT  
CCGGGTCCGGGTGGTATCAACATAACTAGGTTCCAGACCCTGCATCGTTCTTACCTGGGT  
CCGGGTCCGGGTGTTGAAAAAGGTATCTACCAGACCTCTAACTTCCGTGTTTCAGCCGGG  
TCCGGGTCCGGGTGAAAAAGGTATCTACCAGACCTCTAACTTCCGTGTTTCAGCCGACCG  
GTCCGGGTCCGGGTAAAGGTATCTACCAGACCTCTAACTTCCGTGTTTCAGCCGACCGAA  
GGTCCGGGTCCGGGTTCAGACCTCTAACTTCCGTGTTTCAGCCGACCGAATCTATCGTTCGT  
GGTCCGGGTCCGGGTACCTCTAACTTCCGTGTTTCAGCCGACCGAATCTATAGTTAGGTTTC  
GGTCCGGGTCCAGGTAACCGTGCTCTGACCGGTATCGCTGTTGAACAGGACAAAAACAC  
AGGTCCAGGCCCGGGCTTCGGCGGCTTCAACTTCTCTCAGATCCTGCCGGACCCGTCTAA  
AGGTCCGGGTCCGGGTTCGTGCTGCTGAAATCCGTGCTTCTGCTAACCTGGCTGCTACCAA  
AGGTCCGGGTCCGGGTTCGTGCTGCTGAAATCCGTGCTTCTGCTAACCTGGCTGCTATCAA  
AGGTCCGGGTCCGGGTGCTGCTGAAATCCGTGCTTCTGCTAACCTGGCTGCTACCAAAT  
GGGTCCGGGTCCGGGTGCTGCTGAAATCCGTGCTTCTGCTAACCTGGCTGCTATCAAAT  
GGGTCCGGGTCCGGGTGAACCGCAGATCATCACCACCGACAACACCTTCGTTTCTGGTA  
ACGGTCCGGGTCCGGGTACGAACCGCAGATCATCACCACCGACAACACCTTCGTTTCT  
GGTGGTCCGGGTCCGGGTGAACCGCAGATCATCACCACCGACAACACCTTCGTTTCTGG  
TAACGGTCCGGGTCCGGGTGCGTTAACCTGACCACCCGTACCCAGCTGCCGCCGAAAA  
AAGTTAGGGGTCTGCCACAGGGCTTCTCTGCTCTGGAGAAAAAACGTCAGATCGCTCCG  
GGTCAGACCGGTAAAATCGCTAAAAAAGTTCGTCAGATCGCTCCGGGTTCAGACCGGTAC  
CATCAAAAAAACTTCAACTTCAACGGTCTGACCGGTACCGGTGTTAAAAAATCTAAAG  
TTGGTGGTAACTACAACCTACCGTTACCGTAAAAAAGAATGCGACATCCCGATCGGTGCT

GGTATCTGCGCTAAAAACACGTTACCTACGTTCCGGCTCAGGAAAAAACTTCAAAA  
AAACAACACCGTTTACGACCCGCTGCAGCCGGAAGTAAAAAATACGACCCGCTGCAGC  
CGGAAGTGGACTCTAAAAAAACTCTGTTGCTAAAAAAAACCACACCTCTCCGAAA  
AAAAACCACACCTCTCCGAAAAAACCGGTGCTCTGCTGGCTGCTGGTGCTGCTGCT-3'

## 2 Supplementary Figures

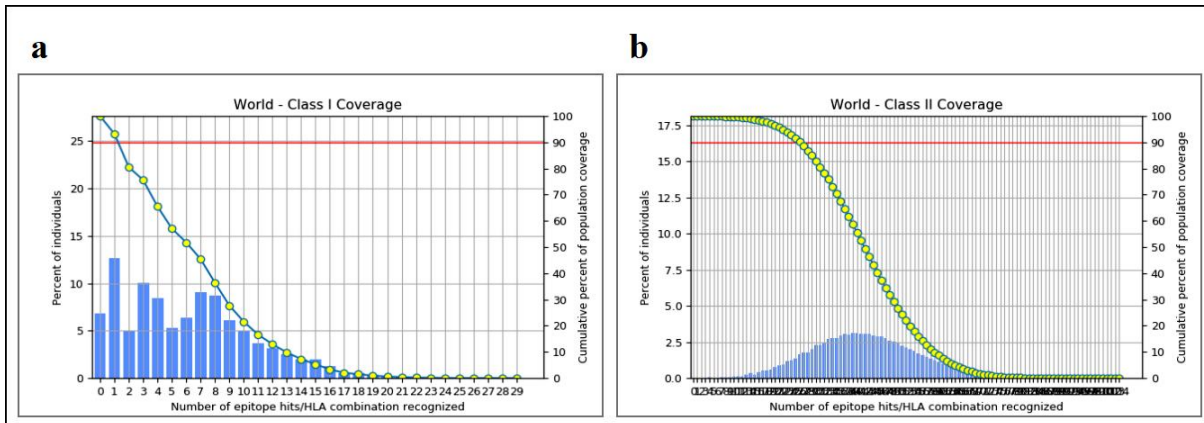

Supplementary Figure 1. The evaluation of *rSMEV* population coverage.

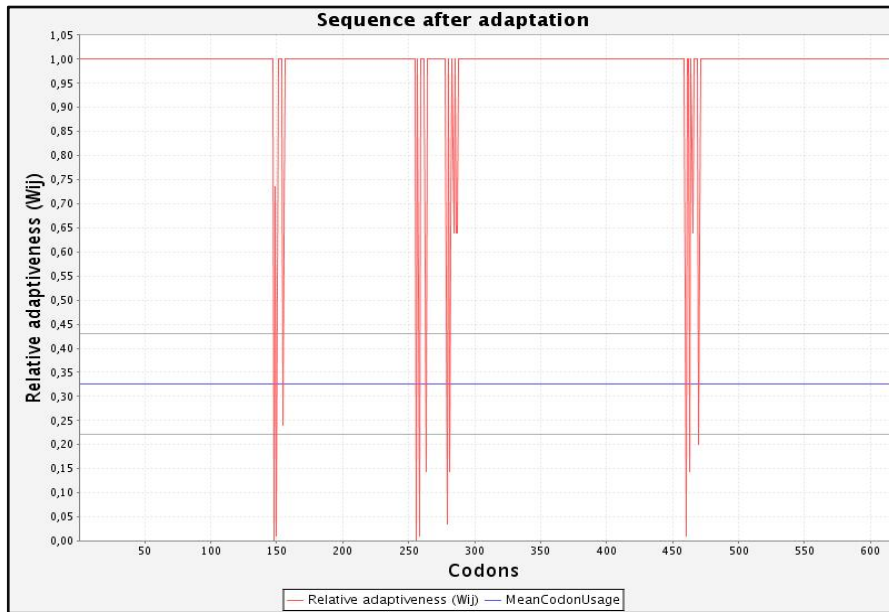

Supplementary Figure 2. The codon optimization of *rSMEV*.

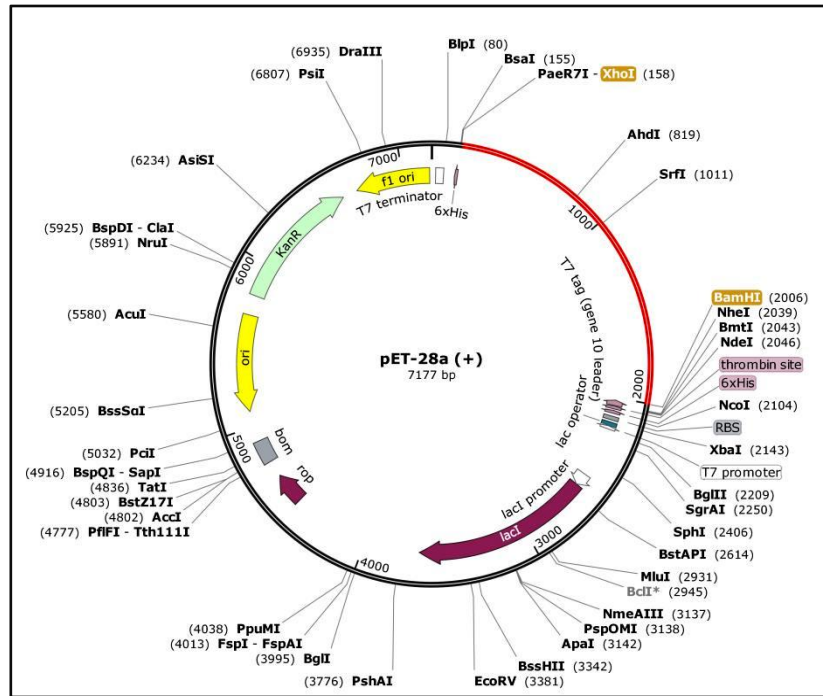

Supplementary Figure 3. The silico cloning of *rSMEV*.



### 3 Supplementary Tables

**Supplementary Table 1.** The CTL epitopes of vaccine construction

| No. | Epitope sequence | Antigenicity value <sup>a</sup> | Variant epitope <sup>b</sup> | Protein | Lineage    |
|-----|------------------|---------------------------------|------------------------------|---------|------------|
| 1   | TTRTQLPPAY       | 1.2001                          | RTRTQLPPAY                   | S       | Wuhan-Hu-1 |
| 2   | RTRTQLPPAY       | 1.2188                          | LQSYGFQPTY                   |         | B.1.1.7    |
| 3   | YTNSFTRGVY       | -0.3695                         |                              |         | B.1.351    |
| 4   | LPFFSNVTWF       | 0.6567                          |                              |         | P.1        |
| 5   | SSANNCTFEY       | -0.0845                         |                              |         | B.1.429    |
| 6   | CTFEYVSQPF       | 0.2678                          |                              |         | B.1.617.2  |
| 7   | LPIGINITRF       | 1.3027                          |                              |         |            |
| 8   | CTLKSFTVEK       | 0.0174                          |                              |         |            |
| 9   | FPNITNLCPF       | 1.3964                          |                              |         |            |
| 10  | YSVLYNSASF       | 0.1881                          |                              |         |            |
| 11  | LQSYGFQPTY       | 0.8035                          |                              |         |            |
| 12  | QPYRVVLSF        | 0.8458                          |                              |         |            |
| 13  | NTSNQVAVLY       | 0.4403                          |                              |         |            |
| 14  | RVYSTGSNVF       | -0.1018                         |                              |         |            |
| 15  | SVASQSIIAY       | 0.2707                          |                              |         |            |
| 16  | FVSNGTHWFV       | -0.1079                         |                              |         |            |

<sup>a</sup> When the antigenicity value  $>0.4$  (default threshold), the epitopes were used to construct vaccine.

<sup>b</sup> The antigen epitopes that appeared only in SARS-CoV-2 variants.

**Supplementary Table 2.** The HTL epitopes of vaccine construction

| No. | Peptide sequence | Antigenicity value <sup>a</sup> | Variant epitope <sup>b</sup> | Protein | Lineage    |
|-----|------------------|---------------------------------|------------------------------|---------|------------|
| 1   | PDKVFRSSVLHSTQD  | -0.0726                         | IGINITRFQTLHRSY              | S       | Wuhan-Hu-1 |
| 2   | DKVFRSSVLHSTQDL  | -0.0738                         | NDGVYFASTEKSNII              |         | B.1.1.7    |
| 3   | IGINITRFQTLHRSY  | 0.8700                          | GINITRFQTLHRSYL              |         | B.1.351    |
| 4   | NDGVYFASTEKSNII  | 0.4277                          | ENQKLIANQFNSAIG              |         | P.1        |
| 5   | HTPINLVRDLPQGS   | 0.3970                          | RAAEIRASANLAAIK              |         | B.1.429    |
| 6   | GINITRFQTLHRSYL  | 0.6001                          | AAEIRASANLAAIKM              |         | B.1.617.2  |
| 7   | VEKGIYQTSNFRVQP  | 0.7959                          | YEPQIITDNTFVSG               |         |            |
| 8   | EKGIYQTSNFRVQPT  | 0.9243                          |                              |         |            |
| 9   | KGIYQTSNFRVQPTE  | 0.8838                          |                              |         |            |
| 10  | QTSNFRVQPTEIVR   | 0.4885                          |                              |         |            |
| 11  | TSNFRVQPTEIVRF   | 0.4574                          |                              |         |            |
| 12  | NRALTGIAVEQDKNT  | 0.5298                          |                              |         |            |
| 13  | FGGFNFSQILPDPSK  | 0.4404                          |                              |         |            |
| 14  | NQKLIANQFNSAIGK  | -0.1261                         |                              |         |            |
| 15  | ENQKLIANQFNSAIG  | 0.0952                          |                              |         |            |
| 16  | RAAEIRASANLAATK  | 0.5709                          |                              |         |            |
| 17  | RAAEIRASANLAAIK  | 0.5150                          |                              |         |            |
| 18  | AAEIRASANLAATKM  | 0.7125                          |                              |         |            |
| 19  | AAEIRASANLAAIKM  | 0.7249                          |                              |         |            |
| 20  | EPQIITDNTFVSGN   | 0.4586                          |                              |         |            |
| 21  | YEPQIITDNTFVSG   | 0.5066                          |                              |         |            |

<sup>a</sup> When the antigenicity value  $>0.4$  (default threshold), the epitopes were used to construct vaccine.

<sup>b</sup> The antigen epitopes that appeared only in SARS-CoV-2 variants.

**Supplementary Table 3.** The linear B-cell epitopes of vaccine construction

| No. | Peptide sequence | Antigenicity value <sup>a</sup> | Variant epitope <sup>b</sup> | Protein | Lineage involved |
|-----|------------------|---------------------------------|------------------------------|---------|------------------|
| 1   | CVNLTTRTQLPP     | 1.6490                          | VRGLPQGFSALE                 | S       | Wuhan-Hu-1       |
| 2   | TRGVYYDPDKVFR    | 0.3643                          | VRQIAPGQTGTI                 |         | B.1.1.7          |
| 3   | STQDLFLPFFSN     | 0.1041                          | NFNFNGLTGTGV                 |         | B.1.351          |
| 4   | ASTEKSNIIRGW     | -0.5092                         | GFIKQYGDCLGD                 |         | P.1              |
| 5   | VRGLPQGFSALE     | 0.7372                          |                              |         | B.1.429          |
| 6   | TPGDSSSGWTAG     | 0.0746                          |                              |         | B.1.617.2        |
| 7   | PTESIVRFPNIT     | -0.0307                         |                              |         |                  |
| 8   | RQIAPGQTGKIA     | 1.4558                          |                              |         |                  |
| 9   | VRQIAPGQTGTI     | 1.0477                          |                              |         |                  |
| 10  | NFNFNGLTGTGV     | 1.3547                          |                              |         |                  |
| 11  | SKVGGNYNYRZR     | 1.3631                          |                              |         |                  |
| 12  | VITPGTNTSNQV     | 0.3818                          |                              |         |                  |
| 13  | ECDIPIGAGICA     | 0.5970                          |                              |         |                  |
| 14  | YQTQTNPRRAR      | 0.0760                          |                              |         |                  |
| 15  | YKTPPIKDFGGF     | -0.3433                         |                              |         |                  |
| 16  | GFIKQYGDCLGD     | -0.3836                         |                              |         |                  |
| 17  | HVTYVPAQEKNF     | 1.1353                          |                              |         |                  |
| 18  | ITTDNTFVSGNC     | 0.1449                          |                              |         |                  |
| 19  | NNTVYDPLQPEL     | 0.4440                          |                              |         |                  |
| 20  | CGSCCKFDEDDES    | 0.3274                          |                              |         |                  |

<sup>a</sup> When the antigenicity value >0.4 (default threshold), the epitopes were used to construct vaccine.

<sup>b</sup> The antigen epitopes that appeared only in SARS-CoV-2 variants.

**Supplementary Table 4.** The conformational B-cell epitopes of vaccine construction

| No. | Peptide sequence                                                     | Score | Lineage    |
|-----|----------------------------------------------------------------------|-------|------------|
| 1   | Y1138, D1139, P1140, L1141, Q1142, P1143, E1144, L1145, D1146, S1147 | 0.964 | Wuhan-Hu-1 |
| 2   | N700, S701, V702, A703                                               | 0.611 | B.1.1.7    |
| 3   | K1154, N1155, H1156, T1157, S1158, P1159                             | 0.997 | B.1.351    |
| 4   | N1158, H1159, T1160, S1161, P1162                                    | 0.997 | P.1        |
| 5   | N1158, H1159, T1160, S1161, P1162                                    | 0.997 | B.1.429    |
| 6   | N1156, H1157, T1158, S1159, P1160                                    | 0.997 | B.1.617.2  |

**Supplementary Table 5.** HLA-I alleles used in screening CTL epitopes

| NO. | Epitopes   | Alleles involved <sup>a</sup>                                                             |
|-----|------------|-------------------------------------------------------------------------------------------|
| 1   | TTRTQLPPAY | HLA-A*01:01, HLA-A*26:01, HLA-A*30:01, HLA-A*30:02                                        |
| 2   | RTRTQLPPAY | HLA-A*01:01, HLA-A*03:01, HLA-A*30:01, HLA-A*30:02, HLA-B*57:01                           |
| 3   | YTNSFTRGVY | HLA-A*01:01, HLA-A*26:01, HLA-A*30:02, HLA-B*15:01, HLA-B*35:01                           |
| 4   | LPFFSNVTWF | HLA-B*07:02, HLA-B*35:01, HLA-B*51:01, HLA-B*53:01                                        |
| 5   | SSANNCTFEY | HLA-A*01:01, HLA-A*11:01, HLA-A*26:01, HLA-A*30:02, HLA-B*58:01                           |
| 6   | CTFEYVSQPF | HLA-A*26:01, HLA-A*32:01, HLA-B*15:01, HLA-B*35:01, HLA-B*53:01, HLA-B*57:01, HLA-B*58:01 |
| 7   | LPIGINITRF | HLA-B*07:02, HLA-B*35:01, HLA-B*51:01, HLA-B*53:01                                        |
| 8   | CTLKSFTVEK | HLA-A*03:01, HLA-A*11:01, HLA-A*30:01, HLA-A*68:01                                        |
| 9   | FPNITNLCPF | HLA-B*07:02, HLA-B*35:01, HLA-B*51:01, HLA-B*53:01                                        |
| 10  | YSVLYNSASF | HLA-A*26:01, HLA-B*15:01, HLA-B*35:01, HLA-B*53:01, HLA-B*57:01                           |
| 11  | LQSYGFQPTY | HLA-A*01:01, HLA-A*30:02, HLA-B*15:01, HLA-B*44:02, HLA-B*44:03                           |
| 12  | QPYRVVLSF  | HLA-B*07:02, HLA-B*35:01, HLA-B*51:01, HLA-B*53:01                                        |
| 13  | NTSNQVAVLY | HLA-A*01:01, HLA-A*26:01, HLA-A*30:02, HLA-A*68:01                                        |
| 14  | RVYSTGSNVF | HLA-A*30:02, HLA-A*32:01, HLA-B*07:02, HLA-B*15:01, HLA-B*57:01, HLA-B*58:01              |
| 15  | SVASQSIIAY | HLA-A*01:01, HLA-A*03:01, HLA-A*11:01, HLA-A*26:01, HLA-A*30:02, HLA-B*15:01, HLA-B*35:01 |
| 16  | FVSNQTHWV  | HLA-A*02:01, HLA-A*02:03, HLA-A*02:06, HLA-A*68:02                                        |

<sup>a</sup> The alleles of CTL epitopes in the rSMEV, they were derived from 27 HLA-I alleles used to predict CTL epitopes.

**Supplementary Table 6.** HLA-II alleles used in screening HTL epitopes

| NO. | Epitopes        | Alleles involved <sup>a</sup>                                                                                                                                                                                                                                     |
|-----|-----------------|-------------------------------------------------------------------------------------------------------------------------------------------------------------------------------------------------------------------------------------------------------------------|
| 1   | PDKVFRSSVLHSTQD | HLA-DRB4*01:01, HLA-DQA1*05:01/DQB1*03:01, HLA-DQA1*04:01/DQB1*04:02, HLA-DQA1*01:02/DQB1*06:02, HLA-DPA1*02:01/DPB1*01:01, HLA-DPA1*01:03/DPB1*02:01, HLA-DPA1*01:03/DPB1*04:01, HLA-DPA1*03:01/DPB1*04:02, HLA-DPA1*02:01/DPB1*05:01, HLA-DPA1*02:01/DPB1*14:01 |
| 2   | DKVFRSSVLHSTQDL | HLA-DQA1*05:01/DQB1*03:01, HLA-DQA1*01:02/DQB1*06:02, HLA-DPA1*02:01/DPB1*01:01, HLA-DPA1*01:03/DPB1*02:01, HLA-DPA1*01:03/DPB1*04:01, HLA-DPA1*03:01/DPB1*04:02, HLA-DPA1*02:01/DPB1*05:01, HLA-DPA1*02:01/DPB1*14:01                                            |
| 3   | IGINITRFQTLHRSY | HLA-DRB1*15:01, HLA-DPA1*02:01/DPB1*01:01, HLA-DPA1*01:03/DPB1*02:01, HLA-DPA1*01:03/DPB1*04:01, HLA-DPA1*03:01/DPB1*04:02, HLA-DPA1*02:01/DPB1*05:01                                                                                                             |
| 4   | NDGVYFASTEKSNII | HLA-DRB1*04:01, HLA-DRB4*01:01, HLA-DQA1*05:01/DQB1*02:01, HLA-DQA1*05:01/DQB1*03:01, HLA-DQA1*03:01/DQB1*03:02, HLA-DQA1*04:01/DQB1*04:02                                                                                                                        |
| 5   | HTPINLVRDLPQGS  | HLA-DRB1*03:01, HLA-DRB1*04:01, HLA-DRB1*04:05, HLA-DRB3*01:01, HLA-DRB4*01:01, HLA-DQA1*03:01/DQB1*03:02, HLA-DQA1*01:01/DQB1*05:01                                                                                                                              |
| 6   | GINITRFQTLHRSYL | HLA-DRB1*15:01, HLA-DRB5*01:01, HLA-DPA1*02:01/DPB1*01:01, HLA-DPA1*01:03/DPB1*02:01, HLA-DPA1*01:03/DPB1*04:01, HLA-DPA1*03:01/DPB1*04:02, HLA-DPA1*02:01/DPB1*05:01                                                                                             |
| 7   | VEKGIYQTSNFRVQP | HLA-DRB1*07:01, HLA-DRB1*09:01, HLA-DRB1*12:01, HLA-DRB1*13:02, HLA-DRB1*15:01, HLA-DQA1*01:01/DQB1*05:01, HLA-DPA1*02:01/DPB1*01:01, HLA-DPA1*01:03/DPB1*02:01, HLA-DPA1*01:03/DPB1*04:01, HLA-DPA1*03:01/DPB1*04:02, HLA-DPA1*02:01/DPB1*05:01                  |
| 8   | EKGIYQTSNFRVQPT | HLA-DRB1*07:01, HLA-DRB1*09:01, HLA-DRB1*12:01, HLA-DRB1*13:02, HLA-DRB1*15:01, HLA-DQA1*01:01/DQB1*05:01, HLA-DPA1*02:01/DPB1*01:01, HLA-DPA1*01:03/DPB1*02:01, HLA-DPA1*01:03/DPB1*04:01, HLA-DPA1*03:01/DPB1*04:02, HLA-DPA1*02:01/DPB1*05:01                  |
| 9   | KGIYQTSNFRVQPTE | HLA-DRB1*07:01, HLA-DRB1*13:02, HLA-DRB1*15:01, HLA-DPA1*02:01/DPB1*01:01, HLA-DPA1*01:03/DPB1*02:01, HLA-DPA1*01:03/DPB1*04:01, HLA-DPA1*03:01/DPB1*04:02, HLA-DPA1*02:01/DPB1*05:01,                                                                            |
| 10  | QTSNFRVQPTEIVR  | HLA-DRB1*01:01, HLA-DRB1*04:01, HLA-DRB1*04:05, HLA-DRB1*13:02, HLA-DRB3*01:01, HLA-DRB3*02:02, HLA-DRB4*01:01, HLA-DRB5*01:01, HLA-DPA1*02:01/DPB1*01:01, HLA-DPA1*03:01/DPB1*04:02                                                                              |
| 11  | TSNFRVQPTEIVRF  | HLA-DRB1*01:01, HLA-DRB1*04:01, HLA-DRB1*04:05, HLA-DRB1*13:02, HLA-DRB3*01:01, HLA-DRB3*02:02, HLA-DRB4*01:01, HLA-DRB5*01:01, HLA-DPA1*02:01/DPB1*01:01, HLA-DPA1*03:01/DPB1*04:02                                                                              |
| 12  | NRALTGIAVEQDKNT | HLA-DRB1*04:05, HLA-DRB4*01:01, HLA-DQA1*05:01/DQB1*02:01, HLA-DQA1*03:01/DQB1*03:02, HLA-DQA1*04:01/DQB1*04:02, HLA-DQA1*01:01/DQB1*05:01, HLA-DQA1*01:02/DQB1*06:02                                                                                             |
| 13  | FGGFNFSQILPDPK  | HLA-DRB1*04:05, HLA-DRB1*07:01, HLA-DRB1*09:01, HLA-DQA1*05:01/DQB1*02:01, HLA-DQA1*05:01/DQB1*03:01, HLA-DQA1*03:01/DQB1*03:02, HLA-DQA1*04:01/DQB1*04:02, HLA-DPA1*02:01/DPB1*01:01, HLA-DPA1*01:03/DPB1*04:01, HLA-DPA1*03:01/DPB1*04:02                       |
| 14  | NQKLIANQFNSAIGK | HLA-DRB1*13:02, HLA-DRB3*02:02, HLA-DPA1*02:01/DPB1*01:01, HLA-DPA1*01:03/DPB1*02:01, HLA-DPA1*01:03/DPB1*04:01, HLA-DPA1*03:01/DPB1*04:02, HLA-DPA1*02:01/DPB1*05:01                                                                                             |
| 15  | ENQKLIANQFNSAIG | HLA-DPA1*02:01/DPB1*01:01, HLA-DPA1*01:03/DPB1*02:01, HLA-DPA1*01:03/DPB1*04:01, HLA-DPA1*03:01/DPB1*04:02, HLA-DPA1*02:01/DPB1*05:01                                                                                                                             |
| 16  | RAAEIRASANLAATK | HLA-DRB1*04:01, HLA-DRB1*08:02, HLA-DRB1*13:02, HLA-DRB1*15:01, HLA-DRB3*02:02, HLA-DRB4*01:01, HLA-DPA1*02:01/DPB1*14:01,                                                                                                                                        |
| 17  | RAAEIRASANLAAIK | HLA-DRB1*04:01, HLA-DRB1*08:02, HLA-DRB1*13:02, HLA-DRB1*15:01, HLA-DRB3*02:02, HLA-DRB4*01:01, HLA-DPA1*02:01/DPB1*14:01,                                                                                                                                        |
| 18  | AAEIRASANLAATKM | HLA-DRB1*04:01, HLA-DRB1*08:02, HLA-DRB1*13:02, HLA-DRB1*15:01, HLA-DRB3*02:02, HLA-DRB4*01:01, HLA-DPA1*02:01/DPB1*14:01                                                                                                                                         |
| 19  | AAEIRASANLAAIKM | HLA-DRB1*04:01, HLA-DRB1*08:02, HLA-DRB1*13:02, HLA-DRB1*15:01, HLA-DRB3*02:02, HLA-DRB4*01:01, HLA-DPA1*02:01/DPB1*14:01                                                                                                                                         |
| 20  | EPQIITDNTFVSGN  | HLA-DRB1*03:01, HLA-DRB1*04:01, HLA-DRB1*07:01, HLA-DRB1*13:02, HLA-DRB3*01:01, HLA-DQA1*05:01/DQB1*02:01, HLA-DQA1*03:01/DQB1*03:02,                                                                                                                             |
| 21  | YEPQIITDNTFVSG  | HLA-DRB1*03:01, HLA-DRB1*04:01, HLA-DRB1*07:01, HLA-DRB1*13:02, HLA-DRB3*01:01, HLA-DQA1*05:01/DQB1*02:01, HLA-DQA1*03:01/DQB1*03:02,                                                                                                                             |
| 22  | EPQIITDNTFVSGN  | HLA-DRB1*03:01, HLA-DRB1*04:01, HLA-DRB1*07:01, HLA-DRB1*13:02, HLA-DRB3*01:01, HLA-DQA1*05:01/DQB1*02:01, HLA-DQA1*03:01/DQB1*03:02                                                                                                                              |

<sup>a</sup> The alleles of HTL epitopes in the rSMEV, they were derived from 27 HLA-II alleles used to predict HTL epitopes.

**Supplementary Table 7.** The result of molecular docking between TLR-3 and *rSMEV*

| <b>Cluster</b> | <b>Members</b> | <b>Representative</b> | <b>Weighted Score</b> |
|----------------|----------------|-----------------------|-----------------------|
| 0              | 44             | Lowest Energy         | -1175.3               |
| 1              | 43             | Lowest Energy         | -1145.5               |
| 2              | 34             | Lowest Energy         | -1174.1               |
| 3              | 29             | Lowest Energy         | -1187.9               |
| 4              | 28             | Lowest Energy         | -1454.2               |
| 5              | 26             | Lowest Energy         | -1221.2               |
| 6              | 21             | Lowest Energy         | -1182.5               |
| 7              | 21             | Lowest Energy         | -1065.4               |
| 8              | 20             | Lowest Energy         | -1160.5               |
| 9              | 19             | Lowest Energy         | -1154.0               |
| 10             | 18             | Lowest Energy         | -1129.7               |
| 11             | 17             | Lowest Energy         | -1098.6               |
| 12             | 16             | Lowest Energy         | -1136.0               |
| 13             | 16             | Lowest Energy         | -1096.1               |
| 14             | 16             | Lowest Energy         | -1196.5               |
| 15             | 15             | Lowest Energy         | -1110.3               |
| 16             | 14             | Lowest Energy         | -1197.3               |
| 17             | 14             | Lowest Energy         | -1204.9               |
| 18             | 14             | Lowest Energy         | -1173.4               |
| 19             | 13             | Lowest Energy         | -1130.3               |
| 20             | 13             | Lowest Energy         | -1169.6               |
| 21             | 12             | Lowest Energy         | -1141.4               |
| 22             | 12             | Lowest Energy         | -1167.1               |
| 23             | 12             | Lowest Energy         | -1269.1               |
| 24             | 12             | Lowest Energy         | -1176.0               |
| 25             | 11             | Lowest Energy         | -1089.8               |
| 26             | 11             | Lowest Energy         | -1156.4               |
| 27             | 11             | Lowest Energy         | -1064.0               |
| 28             | 11             | Lowest Energy         | -1059.0               |
| 29             | 10             | Lowest Energy         | -1161.8               |

**Supplementary Table 8.** The binding free energy detected by MMGBSA tool

| <b>Energy Component</b> | <b>Average</b> | <b>Std. Dev.</b> | <b>Std. Err. of Mean</b> |
|-------------------------|----------------|------------------|--------------------------|
| BOND                    | 0.0000         | 0.0000           | 0.0000                   |
| ANGLE                   | 0.0000         | 0.0000           | 0.0000                   |
| DIHED                   | -0.0015        | 0.0045           | 0.0011                   |
| VDWAALS                 | -109.1011      | 5.9343           | 1.4836                   |
| EEL                     | -301.7082      | 27.5595          | 6.8899                   |
| 1-4 VDW                 | 0.0000         | 0.0001           | 0.0000                   |
| 1-4 EEL                 | 0.0000         | 0.0001           | 0.0000                   |
| EGB                     | 346.4172       | 24.5425          | 6.1356                   |
| ESURF                   | -18.1701       | 0.7439           | 0.1860                   |
| DELTA G gas             | -409.7108      | 23.8453          | 5.9613                   |
| DELTA G solv            | 328.2241       | 24.7952          | 6.1988                   |
| DELTA TOTAL             | -88.5437       | 6.9146           | 1.7287                   |
